# Supplementary material for: Screening for Core Genes Related to Pathogenesis of Alzheimer’s Disease
Source: Front Cell Dev Biol. 2021 Apr 22;9:668738. doi: 10.3389/fcell.2021.668738 (PMC8101499; doi:10.3389/fcell.2021.668738)
Supplement: Supplementary Table 1 — Top 500 genes selected by mRMR analysis. [file Table_1.XLS]

Order	Fea	Name	Score
1	8954	KIAA0556	0.28
2	3801	CLPTM1	0.138
3	1192	ATXN1L	0.143
4	5410	ENAH	0.112
5	20398	MZF1	0.107
6	3993	CORO1C	0.1
7	8187	HSPB3	0.097
8	22619	PPM1B	0.088
9	21794	PCCB	0.085
10	17457	LOC727761	0.09
11	21652	PABPC1L	0.091
12	343	AEBP1	0.088
13	23821	RNU1G2	0.081
14	2622	C6orf81	0.084
15	2305	C21orf62	0.084
16	17799	LOC728678	0.086
17	17739	LOC728533	0.086
18	22997	PSMD5	0.08
19	25813	STAG1	0.081
20	23018	PSTPIP1	0.079
21	8137	HSD17B1	0.079
22	6637	FLT3LG	0.078
23	24083	RUNX1T1	0.073
24	22684	PPP4R1	0.077
25	3393	CDK2AP1	0.073
26	18582	LOC90113	0.077
27	1792	C14orf139	0.074
28	26584	TMEM111	0.073
29	25548	SPAG1	0.072
30	27775	VPRBP	0.072
31	22471	POGK	0.072
32	22322	PLCE1	0.072
33	18593	LOC91664	0.073
34	28106	YWHAE	0.071
35	4842	DLEC1	0.071
36	2307	C21orf66	0.071
37	7057	GFAP	0.07
38	20691	NFKB1	0.069
39	1038	ASL	0.069
40	22315	PLCB1	0.068
41	22945	PSD2	0.067
42	104	ABI3BP	0.067
43	1482	BPTF	0.067
44	25425	SNORD99	0.069
45	381	AGPAT1	0.067
46	9592	LILRB5	0.066
47	24215	SCARF2	0.065
48	3381	CDH26	0.065
49	9444	LASS1	0.066
50	16007	LOC649503	0.066
51	28163	ZC3H12C	0.065
52	22272	PKN2	0.066
53	5638	F8A1	0.066
54	18465	LOC731308	0.064
55	24511	SFRS1	0.065
56	1868	C15orf52	0.065
57	5792	FAM171A1	0.065
58	8797	KCNF1	0.064
59	6865	GABBR1	0.063
60	22020	PER1	0.064
61	3895	COBL	0.064
62	20968	NSBP1	0.063
63	23298	RAF1	0.062
64	4473	DAB2	0.062
65	9192	KLHL35	0.061
66	5697	FAM113A	0.061
67	1279	BAI2	0.061
68	18823	LYG1	0.061
69	7707	HBP1	0.061
70	995	ARX	0.06
71	24470	SERTAD3	0.06
72	177	ACRV1	0.059
73	9584	LILRA2	0.058
74	26192	TBCA	0.058
75	2815	CAB39L	0.059
76	19168	MEIS3	0.059
77	20071	MRPL15	0.058
78	23675	RING1	0.058
79	21634	P2RY10	0.058
80	8889	KDELC2	0.058
81	15031	LOC646144	0.057
82	20741	NIPBL	0.058
83	2937	CARD9	0.056
84	24830	SLC25A35	0.056
85	26734	TMEM49	0.056
86	8750	KANK2	0.056
87	3560	CGN	0.056
88	7812	HEY1	0.056
89	8526	INO80E	0.056
90	23640	RHOQ	0.055
91	4807	DKFZP586I1420	0.056
92	25181	SNORA11	0.055
93	25557	SPAG9	0.054
94	186	ACSL6	0.055
95	11820	LOC143543	0.053
96	21730	PARD3	0.053
97	1114	ATP1A3	0.054
98	18715	LRRC3B	0.054
99	902	ARHGEF6	0.053
100	23462	RBPJ	0.053
101	3728	CLDN15	0.052
102	3497	CENTD2	0.053
103	23041	PTGES2	0.052
104	20216	MTG1	0.052
105	21979	PDPN	0.052
106	2040	C19orf64	0.052
107	20957	NRN1	0.052
108	22516	POLR3H	0.051
109	24200	SCAF1	0.05
110	7524	GRTP1	0.051
111	25751	SSH3	0.05
112	3097	CCDC46	0.05
113	24680	SIRT1	0.049
114	6162	FES	0.05
115	4950	DNALI1	0.05
116	3570	CHCHD10	0.049
117	2924	CAPS	0.049
118	28492	ZNF438	0.048
119	1462	BNIP3	0.048
120	1871	C15orf57	0.047
121	8599	IRF1	0.047
122	5460	EPHA10	0.047
123	22399	PLXDC2	0.047
124	28288	ZMIZ2	0.047
125	24265	SCN1B	0.047
126	9010	KIAA1310	0.046
127	28217	ZDHHC8P	0.046
128	702	ANTXR2	0.046
129	20504	NCAPD2	0.046
130	27339	TUBB4Q	0.046
131	4605	DDX39	0.046
132	5727	FAM127B	0.046
133	27250	TTC31	0.045
134	20419	NACC2	0.046
135	27465	UBE2W	0.045
136	27070	TRIM48	0.045
137	10002	LOC100129076	0.045
138	8661	ITGB1	0.045
139	26913	TOP1MT	0.044
140	26087	TAF4	0.045
141	7967	HMGA1	0.044
142	5351	ELF2	0.044
143	26102	TAL1	0.044
144	27746	VGF	0.044
145	9242	KRAS	0.044
146	21648	P704P	0.043
147	3107	CCDC55	0.044
148	28541	ZNF513	0.043
149	7500	GRINA	0.044
150	22238	PITPNB	0.042
151	5297	EIF2B4	0.042
152	16698	LOC652258	0.042
153	5430	ENPP5	0.042
154	20992	NT5DC3	0.042
155	1254	B4GALT4	0.042
156	25068	SLTM	0.041
157	8716	JARID1C	0.041
158	26588	TMEM118	0.041
159	15725	LOC648377	0.04
160	872	ARHGAP22	0.04
161	27805	VPS54	0.04
162	19109	MDH2	0.039
163	18633	LPHN1	0.039
164	27553	UHRF1	0.039
165	24725	SLC12A4	0.039
166	5269	EGR3	0.039
167	7580	GTF2H3	0.039
168	20972	NSL1	0.038
169	597	ANGPT1	0.038
170	22111	PHF12	0.038
171	26176	TBC1D2B	0.038
172	25932	SUB1	0.037
173	4130	CRSP2	0.037
174	21146	OLFM2	0.037
175	19336	MGC5457	0.036
176	24312	SDCCAG3	0.036
177	7209	GMPR	0.036
178	22591	PPDPF	0.035
179	19094	MCM7	0.036
180	5908	FAM5B	0.035
181	27207	TSPO	0.035
182	12039	LOC284023	0.035
183	25679	SPRYD5	0.035
184	20231	MTMR11	0.034
185	27106	TRIP10	0.034
186	9397	L1CAM	0.034
187	6705	FOXJ1	0.033
188	20230	MTMR10	0.033
189	4192	CSNK1G2	0.033
190	1874	C15orf63	0.033
191	27111	TRIP6	0.033
192	2869	CALHM2	0.033
193	28580	ZNF565	0.033
194	10476	LOC100130712	0.032
195	14741	LOC645317	0.032
196	28715	ZNF763	0.032
197	19908	MKRN1	0.031
198	8947	KIAA0460	0.031
199	13761	LOC642921	0.031
200	27473	UBIAD1	0.031
201	5024	DPRXP4	0.031
202	15904	LOC649095	0.031
203	346	AES	0.03
204	21143	OLA1	0.03
205	12377	LOC388588	0.03
206	8754	KAT2A	0.029
207	24883	SLC30A3	0.029
208	28833	ZXDC	0.029
209	4421	CYP2C8	0.029
210	3401	CDK5RAP2	0.029
211	20593	NDUFAB1	0.028
212	27051	TRIM28	0.027
213	837	ARAP3	0.026
214	25502	SORBS1	0.026
215	363	AGAP2	0.026
216	23338	RAPGEF3	0.026
217	64	ABCC12	0.025
218	20076	MRPL2	0.025
219	26513	TLR5	0.025
220	22363	PLEKHH3	0.024
221	28158	ZC3H10	0.024
222	22805	PRKCG	0.023
223	14536	LOC644799	0.023
224	23304	RALA	0.023
225	22269	PKM2	0.022
226	5574	EVC	0.022
227	22151	PHYH	0.022
228	8627	ISG20	0.022
229	3347	CDC42BPB	0.021
230	5726	FAM127A	0.021
231	24489	SEZ6L	0.021
232	22155	PI16	0.021
233	4580	DDIT4L	0.021
234	12371	LOC388556	0.021
235	7995	HN1L	0.021
236	973	ARRDC2	0.02
237	23084	PTPN23	0.02
238	1343	BCL11B	0.02
239	5950	FAM80B	0.02
240	12720	LOC400464	0.02
241	8532	INPP5D	0.019
242	27336	TUBB2C	0.019
243	28426	ZNF322A	0.019
244	22405	PLXNB1	0.018
245	1419	BIRC3	0.018
246	23805	RNFT2	0.018
247	24058	RTKN2	0.018
248	23206	RAB1B	0.018
249	8036	HOMER3	0.018
250	13387	LOC641972	0.017
251	20693	NFKBIA	0.017
252	1202	AUP1	0.017
253	9140	KLC2	0.017
254	20331	MYH3	0.016
255	24170	SAP30L	0.016
256	1526	BSG	0.016
257	18310	LOC730183	0.016
258	22988	PSMD1	0.016
259	12127	LOC286208	0.016
260	1191	ATXN10	0.015
261	4633	DEF6	0.015
262	13589	LOC642489	0.015
263	25012	SLC7A2	0.015
264	1050	ASPRV1	0.014
265	12920	LOC440043	0.014
266	26091	TAF6	0.014
267	835	ARAP1	0.014
268	28328	ZNF160	0.013
269	19003	MAPK8IP2	0.013
270	3657	CHST6	0.012
271	5906	FAM59A	0.012
272	23524	REPIN1	0.011
273	28620	ZNF618	0.011
274	1154	ATP6V0C	0.011
275	20909	NPTX2	0.01
276	1099	ATN1	0.009
277	193	ACSS1	0.01
278	15809	LOC648732	0.009
279	3692	CITED1	0.009
280	12035	LOC283932	0.008
281	22309	PLAGL1	0.008
282	25746	SSBP3	0.008
283	21935	PDE5A	0.008
284	18184	LOC729769	0.008
285	7092	GHDC	0.008
286	20731	NINJ1	0.007
287	20540	NCRNA00085	0.007
288	5294	EIF2B1	0.006
289	23054	PTH2R	0.007
290	25608	SPEN	0.006
291	23439	RBM6	0.006
292	405	AHNAK	0.006
293	7729	HCN2	0.005
294	12866	LOC402221	0.004
295	22947	PSD4	0.004
296	8830	KCNK12	0.003
297	1287	BANF1	0.003
298	21953	PDGFRB	0.003
299	6923	GAL3ST4	0.003
300	20898	NPM2	0.002
301	4559	DCTPP1	0.002
302	28554	ZNF532	0.002
303	301	ADCYAP1	0.002
304	1300	BAT2	0.002
305	18309	LOC730173	0.001
306	16	A2BP1	0.001
307	4194	CSNK2A1	0.001
308	28074	YBX1	0.001
309	23778	RNF208	0
310	3620	CHP	0
311	3585	CHD7	0
312	19920	MLL	-0.001
313	6416	FLJ33630	-0.002
314	27557	UIMC1	-0.002
315	21663	PACS1	-0.002
316	27334	TUBB2A	-0.002
317	17556	LOC728014	-0.003
318	25988	SVOP	-0.003
319	24180	SART1	-0.003
320	12897	LOC407835	-0.003
321	25041	SLCO3A1	-0.003
322	2010	C19orf30	-0.004
323	4966	DNM3	-0.004
324	22502	POLR2H	-0.004
325	734	AP2A1	-0.004
326	23575	RG9MTD1	-0.005
327	6717	FOXO1	-0.005
328	6034	FBL	-0.005
329	3915	COL18A1	-0.006
330	17610	LOC728153	-0.006
331	26025	SYP	-0.007
332	12526	LOC390557	-0.007
333	4462	CYTSA	-0.008
334	8688	ITPKB	-0.008
335	14442	LOC644596	-0.008
336	315	ADIPOR2	-0.009
337	775	APLP1	-0.008
338	28538	ZNF511	-0.009
339	4294	CTXN2	-0.009
340	5916	FAM65C	-0.009
341	9215	KLKB1	-0.009
342	27414	UBA1	-0.01
343	20932	NR2F1	-0.01
344	25280	SNORD104	-0.01
345	26844	TNFRSF1B	-0.011
346	26456	TICAM2	-0.011
347	25162	SNCB	-0.011
348	18772	LSM14A	-0.011
349	7018	GCN1L1	-0.012
350	1081	ATG16L2	-0.012
351	25874	STK38	-0.012
352	6003	FANCB	-0.013
353	19353	MGRN1	-0.013
354	7813	HEY2	-0.013
355	23743	RNF135	-0.014
356	496	ALDOA	-0.014
357	1402	BGN	-0.015
358	7454	GPT	-0.015
359	1734	C12orf53	-0.015
360	26862	TNIP1	-0.016
361	25710	SRGAP1	-0.017
362	2157	C1orf26	-0.017
363	23102	PTPRN	-0.017
364	27753	VIL2	-0.018
365	4246	CTDSP2	-0.018
366	1544	BTBD7	-0.018
367	26018	SYNJ1	-0.019
368	22053	PFKFB4	-0.019
369	1500	BRE	-0.02
370	3809	CLSTN1	-0.021
371	19986	MOCS2	-0.023
372	5668	FAM100A	-0.023
373	25431	SNRNP35	-0.023
374	25618	SPHKAP	-0.023
375	2820	CABP1	-0.024
376	7088	GGTLC1	-0.024
377	6837	FYCO1	-0.024
378	28184	ZCCHC24	-0.025
379	3647	CHST1	-0.025
380	7328	GPI	-0.026
381	23774	RNF19B	-0.027
382	9167	KLHDC9	-0.027
383	20640	NEK11	-0.027
384	27744	VEZF1	-0.028
385	2601	C6orf225	-0.028
386	85	ABHD1	-0.028
387	6685	FOXC1	-0.029
388	26623	TMEM150A	-0.029
389	18903	MAGED1	-0.031
390	3021	CCDC102A	-0.031
391	2872	CALM2	-0.031
392	25729	SRPR	-0.032
393	24062	RTN3	-0.032
394	28643	ZNF652	-0.033
395	6871	GABRA1	-0.033
396	27344	TUBG1	-0.033
397	28339	ZNF184	-0.034
398	15357	LOC647000	-0.034
399	26672	TMEM189	-0.034
400	5781	FAM164C	-0.035
401	194	ACSS2	-0.035
402	19014	MAPT	-0.036
403	20812	NMNAT2	-0.036
404	20567	NDE1	-0.036
405	15233	LOC646675	-0.037
406	27429	UBE1	-0.037
407	23732	RNF114	-0.037
408	4702	DFFA	-0.038
409	24932	SLC39A10	-0.039
410	24816	SLC25A20	-0.039
411	8560	INTS9	-0.039
412	20953	NRGN	-0.04
413	25873	STK36	-0.04
414	24813	SLC25A18	-0.041
415	2885	CAMK1G	-0.043
416	28268	ZHX3	-0.043
417	20884	NPDC1	-0.044
418	1974	C18orf1	-0.046
419	8866	KCNV1	-0.046
420	20910	NPTXR	-0.046
421	28131	ZBTB20	-0.046
422	6280	FLJ10374	-0.046
423	27454	UBE2N	-0.047
424	13405	LOC642031	-0.048
425	26204	TBL2	-0.048
426	20806	NME3	-0.049
427	18685	LRRC14	-0.05
428	20232	MTMR12	-0.05
429	19927	MLLT6	-0.05
430	25058	SLITRK1	-0.052
431	105	ABL1	-0.052
432	11052	LOC100132707	-0.052
433	24747	SLC16A14	-0.054
434	155	ACO2	-0.054
435	2855	CADM4	-0.055
436	27704	VAMP2	-0.055
437	4158	CS	-0.055
438	24063	RTN4	-0.055
439	21895	PCSK1N	-0.056
440	3981	COPS8	-0.056
441	8989	KIAA1107	-0.057
442	5622	EZR	-0.057
443	2635	C7orf27	-0.058
444	26751	TMEM66	-0.059
445	776	APLP2	-0.059
446	26005	SYN1	-0.059
447	26190	TBC1D9	-0.06
448	9948	LOC100128888	-0.06
449	24996	SLC6A17	-0.061
450	513	ALKBH1	-0.061
451	26819	TMX3	-0.062
452	23837	ROBO2	-0.063
453	6262	FKSG30	-0.063
454	3721	CLCN7	-0.064
455	25914	STX1A	-0.066
456	1139	ATP5H	-0.066
457	26701	TMEM216	-0.067
458	2504	C5orf22	-0.067
459	22645	PPP1R16A	-0.068
460	18945	MAP1A	-0.069
461	845	ARF4	-0.071
462	844	ARF3	-0.071
463	24730	SLC12A9	-0.071
464	9534	LEPREL1	-0.072
465	20062	MRLC2	-0.072
466	26953	TPI1	-0.073
467	28107	YWHAG	-0.073
468	6246	FKBP1A	-0.074
469	26608	TMEM137	-0.075
470	3549	CFLAR	-0.077
471	4362	CXorf45	-0.077
472	15232	LOC646674	-0.078
473	20857	NOTCH1	-0.079
474	428	AK1	-0.079
475	22045	PFDN1	-0.08
476	1393	BEX2	-0.08
477	8696	ITSN1	-0.081
478	198	ACTB	-0.083
479	22121	PHF21A	-0.083
480	26329	TERF2	-0.084
481	1243	B3GNT6	-0.085
482	23783	RNF216	-0.086
483	22162	PI4KB	-0.087
484	9524	LEMD2	-0.088
485	20578	NDRG4	-0.089
486	1166	ATP6V1G2	-0.089
487	22029	PEX11B	-0.092
488	1121	ATP2A2	-0.093
489	9512	LDOC1	-0.094
490	24671	SIPA1	-0.094
491	6006	FANCE	-0.097
492	26984	TRABD	-0.097
493	19122	MECP2	-0.098
494	6105	FBXW4	-0.103
495	7857	HIRIP3	-0.107
496	7171	GLRB	-0.108
497	21807	PCDH7	-0.11
498	26936	TP53I13	-0.112
499	23022	PTBP1	-0.114
500	22058	PFN2	-0.116
