# Supplementary material for: Screening for Core Genes Related to Pathogenesis of Alzheimer’s Disease
Source: Front Cell Dev Biol. 2021 Apr 22;9:668738. doi: 10.3389/fcell.2021.668738 (PMC8101499; doi:10.3389/fcell.2021.668738)
Supplement: Supplementary Table 2 — Fifty-two core gene-associated genes obtained by RWR analysis. [file Table_2.XLS]

## Sheet: random_walk
name	score
AEBP1	0.428278
HSPB3	0.425923
BGN	0.0643712
PRNP	0.0246346
NLK	0.0205225
MAP2K1	0.0191287
PDGFRB	0.00349716
FLNC	0.00297302
HSPB1	0.00112529
GFAP	0.000817206
NOTCH1	0.000730385
AGO2	0.000650429
SNCA	0.000627839
PAK1	0.000612014
FOXO4	0.00061103
ZHX3	0.000455173
PNMA2	0.00043374
CDK5R1	0.000433295
APLP1	0.000408306
YWHAG	0.000387653
SYP	0.000378289
ITPKB	0.000357697
FZD9	0.000352108
TSPAN7	0.000315711
DUSP1	0.000239897
CFLAR	0.00023088
NFKBIA	0.000205394
ACTB	0.000186712
PPP3CA	0.000157783
MYOT	0.000127748
INPPL1	7.28e-05
PTRF	6.59e-05
SLC15A3	5.43e-05
GAD2	3.39e-05
ELAVL4	2.7e-05
SNAP25	2.34e-05
FAM107B	2.16e-05
UBE2N	1.81e-05
GLO1	1.79e-05
STXBP1	1.66e-05
CDK11A	1.64e-05
UCHL1	1.47e-05
SYT1	1.42e-05
VAMP2	1.37e-05
STMN2	1.3e-05
GRINA	1.28e-05
KLF2	1.12e-05
PCSK1	1.12e-05
EZR	1.1e-05
PRKCB	1.1e-05
HEY2	1.08e-05
SYT4	1.02e-05
